# Supplementary material for: Zero-dimensional cadmium halide with broad band yellow light emission for white light-emitting diodes
Source: Royal Society of Chemistry journal article supplement (doi:10.1039/d4ce01174k), 2025-01-01
Supplement: d4ce01174k1.pdf [file d4ce01174k1.pdf]

Supporting information

**Zero-Dimensional Cadmium Halide with Broad  
Band Yellow Light Emission for White Light-  
Emitting Diodes**

Na Lin,<sup>ab</sup> Zhao-Yang Hu,<sup>b</sup> Xin-Yue Zhang,<sup>b</sup> Yu Zhang,<sup>b</sup> Kai-Qi Sun,<sup>b</sup>  
Xiao-Wu Lei,<sup>b</sup> Zhihong Jing,<sup>a\*</sup> and Zhi-Wei Chen<sup>b\*</sup>

<sup>a</sup> School of Chemistry and Chemical Engineering, Qufu Normal University, Qufu, Shandong, 273165, P. R. China

<sup>b</sup> Research institute of Optoelectronic Functional Materials, School of Chemistry, Chemical Engineering and Materials, Jining University, Qufu, Shandong, 273155, P. R. China

*Corresponding Authors: Zhihong Jing, Zhi-Wei Chen*

*E-mail: zhhjing@126.com; zw\_chen@jnxy.edu.cn*

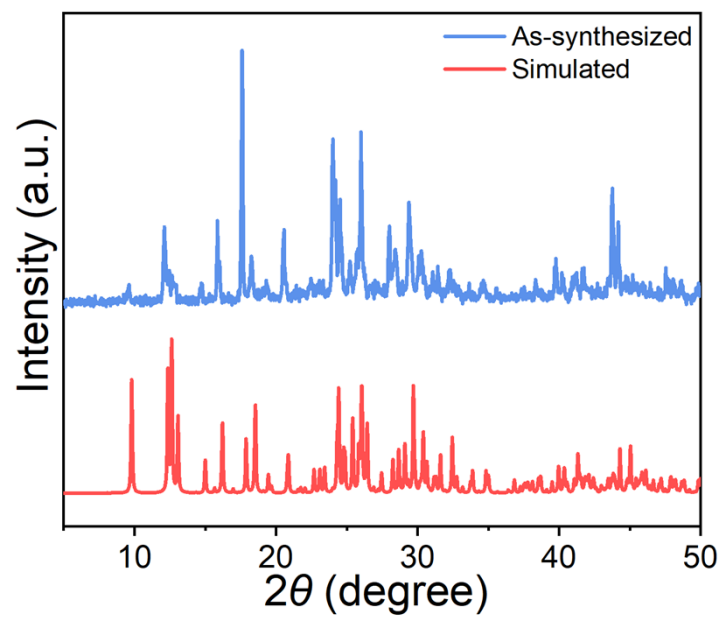

**Figure S1.** Powder X- ray diffraction pattern of (BAPPz)Cd<sub>2</sub>Br<sub>8</sub>·2H<sub>2</sub>O.

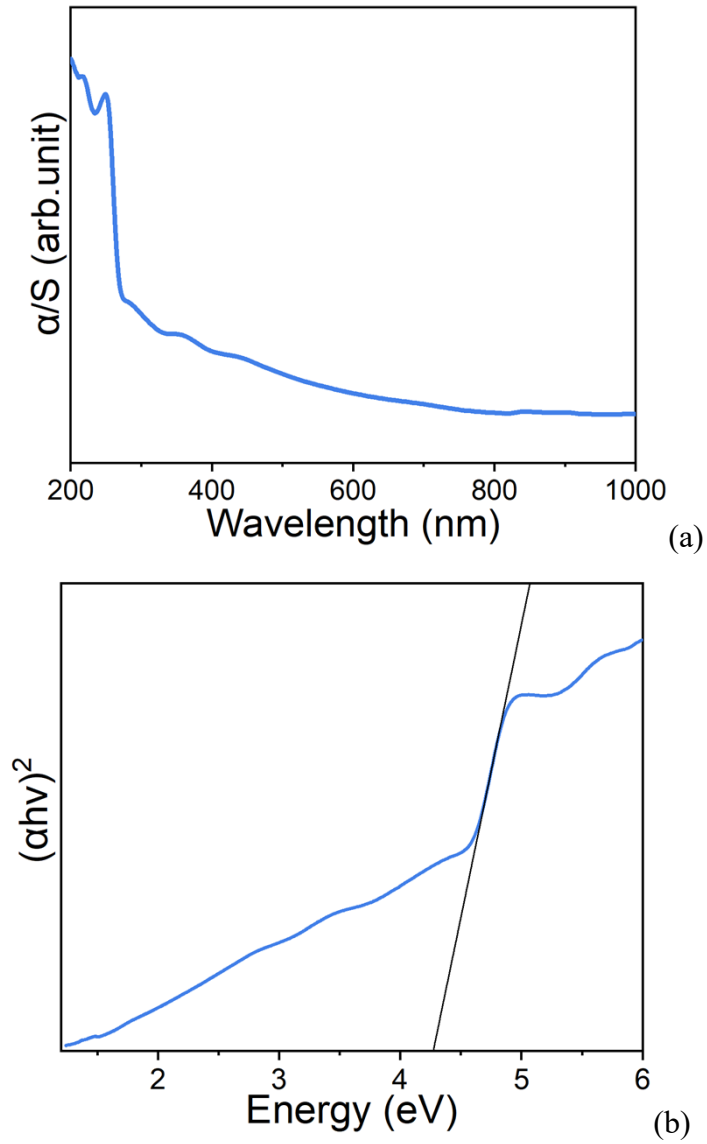

**Figure S2.** The solid state UV-Vis absorption optical spectrum (a) and Tauc's plots based on the assumption of indirect band gap (b) of  $(\text{BAPPz})\text{Cd}_2\text{Br}_8 \cdot 2\text{H}_2\text{O}$ .

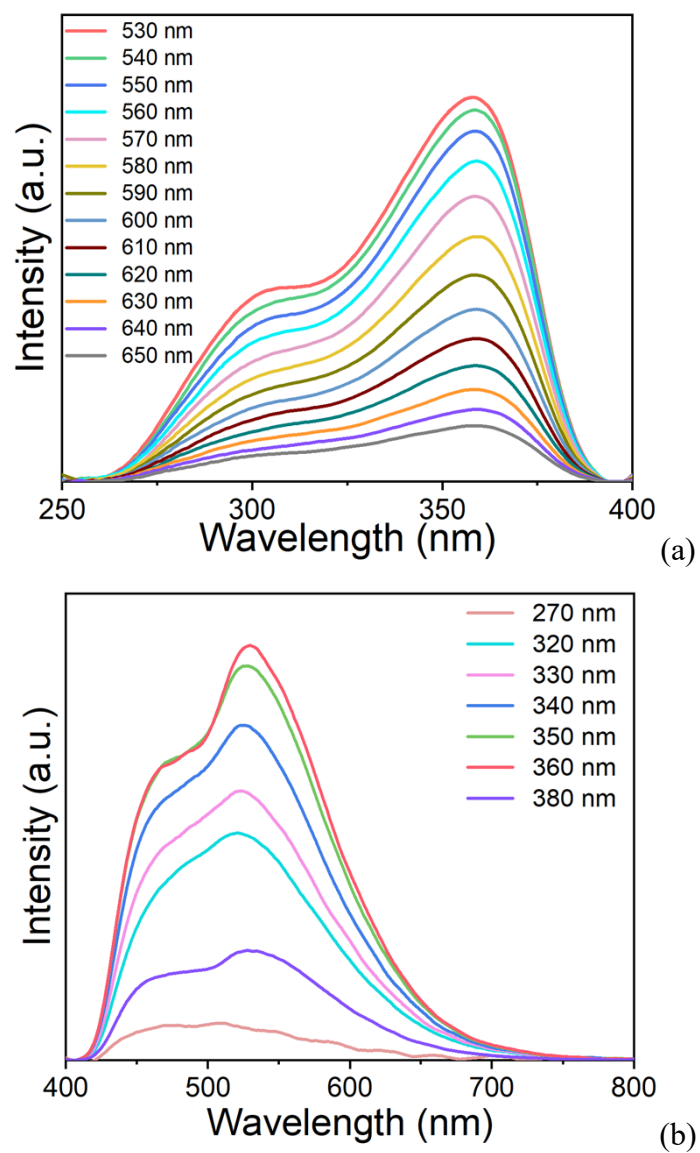

**Figure S3.** (a) Varied PLE spectra and (b) PL spectra of  $(\text{BAPPz})\text{Cd}_2\text{Br}_8 \cdot 2\text{H}_2\text{O}$  at different wavelength.

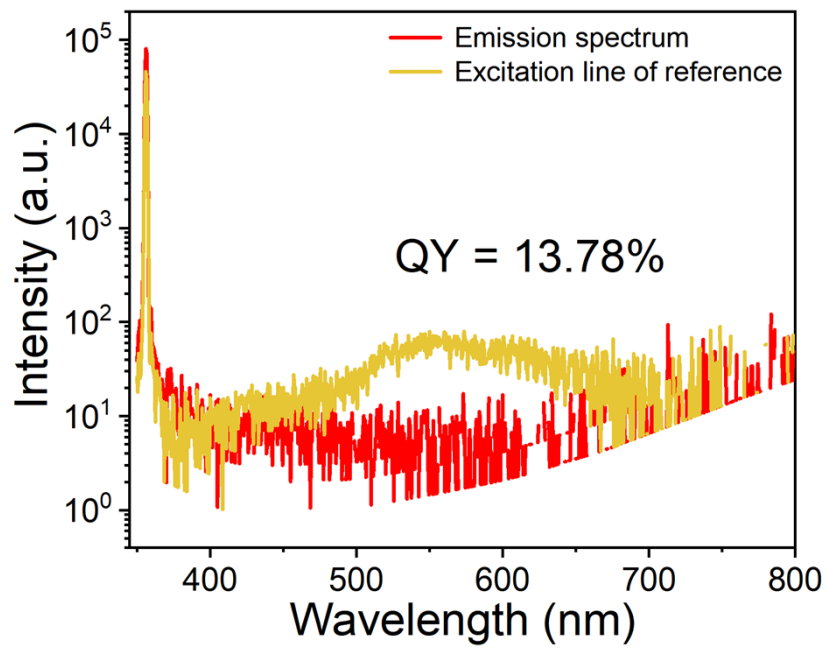

**Figure S4.** The PLQY spectra of  $(\text{BAPPz})\text{Cd}_2\text{Br}_8 \cdot 2\text{H}_2\text{O}$ .

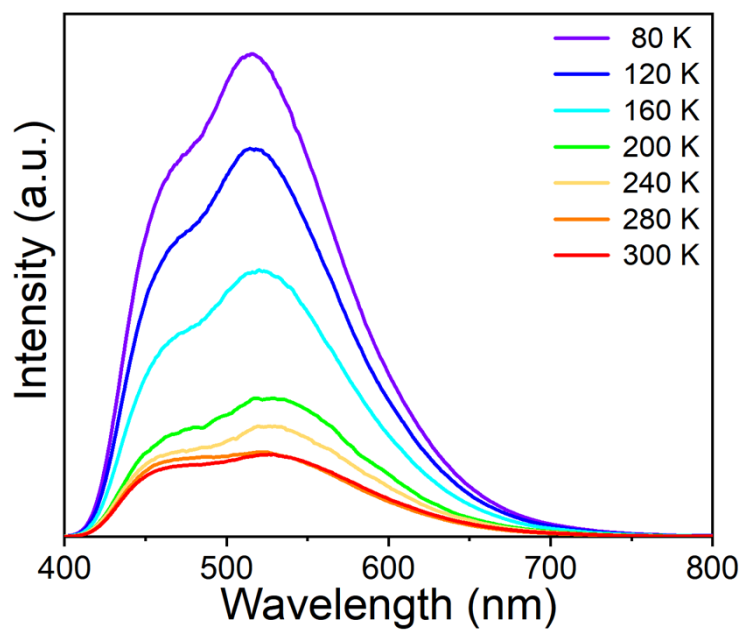

**Figure S5.** Temperature-dependent PL spectra of (BAPPz)Cd<sub>2</sub>Br<sub>8</sub>·2H<sub>2</sub>O.

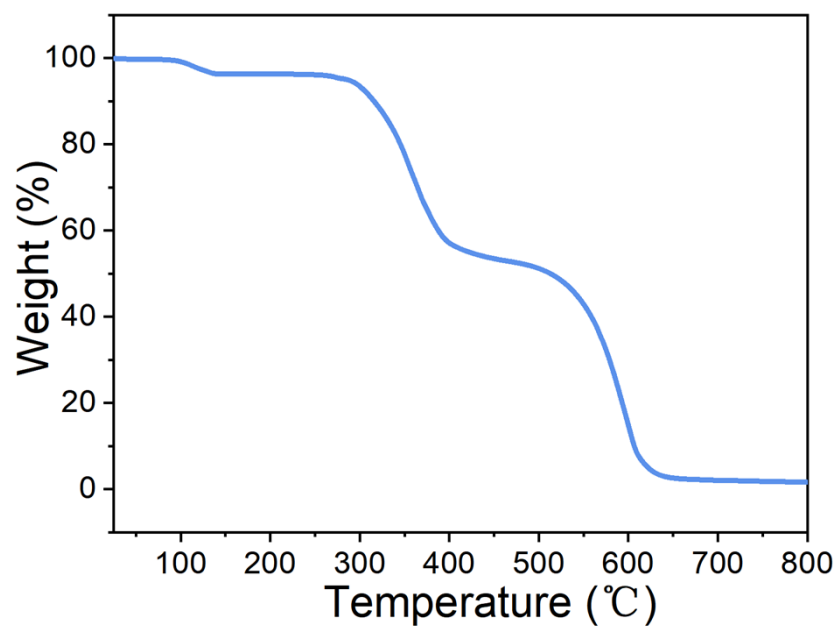

**Figure S6.** The thermogravimetric analyse (TGA) curves of (BAPPz)Cd<sub>2</sub>Br<sub>8</sub>·2H<sub>2</sub>O.

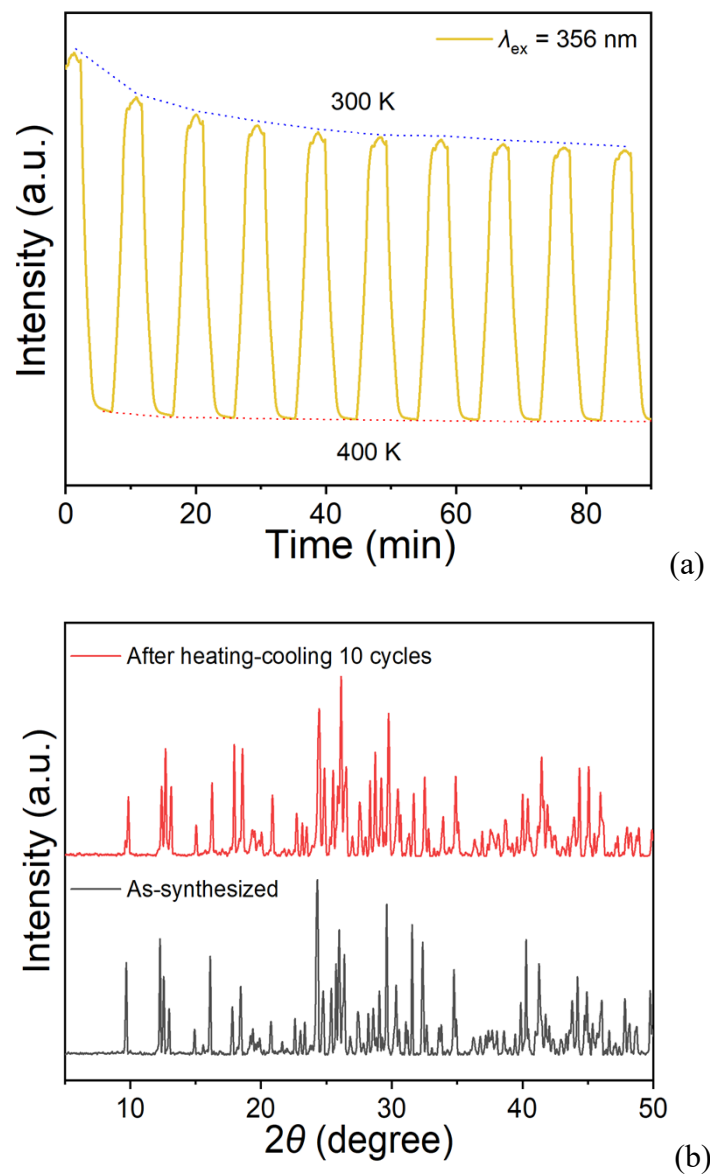

**Figure S7.** (a) The PL intensity investigated by heating-cooling the sample in the temperature range from 300 K to 400 K repeatedly. (b) The XRD patterns of  $(\text{BAPPz})\text{Cd}_2\text{Br}_8 \cdot 2\text{H}_2\text{O}$  after heating-cooling 10 cycles.



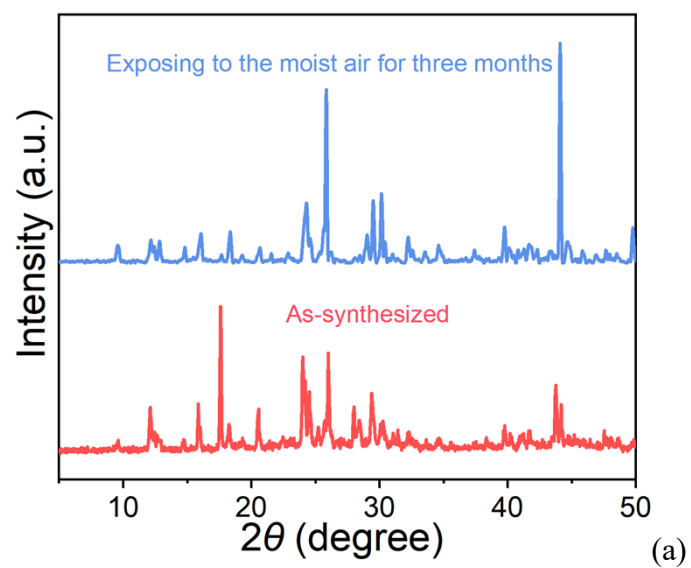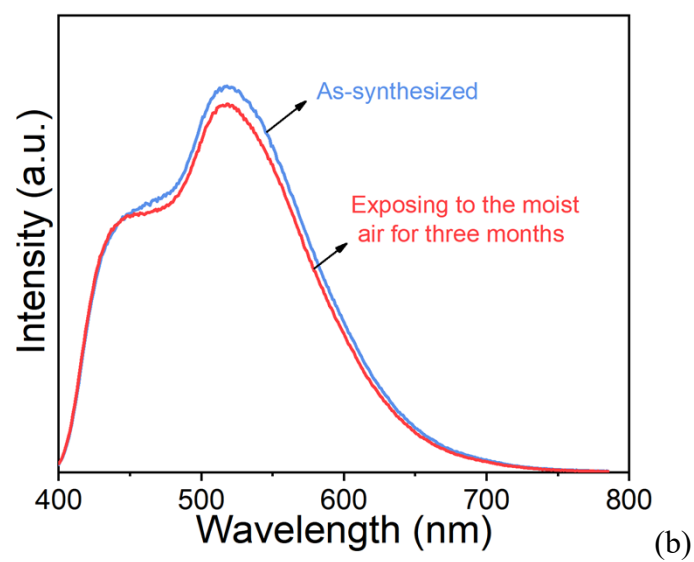

**Figure S8.** The PXR D pattern (a) and PL emission spectra (b) of  $(\text{BAPPz})\text{Cd}_2\text{Br}_8 \cdot 2\text{H}_2\text{O}$  after exposing to the moist air for three months.

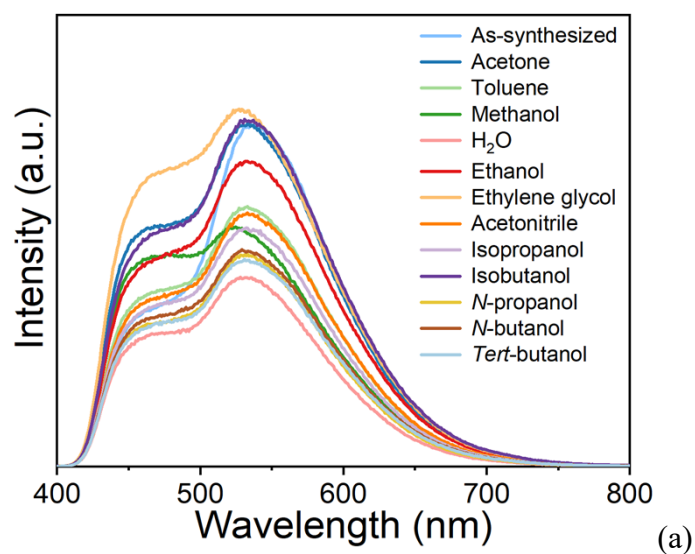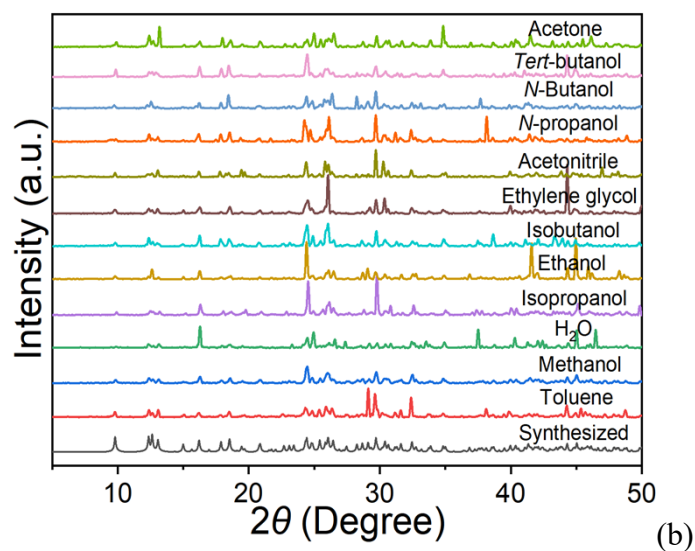

**Figure S9.** (a) PL emission spectra and (b) X-ray diffraction (PXRD) patterns of (BAPPz)Cd<sub>2</sub>Br<sub>8</sub>·2H<sub>2</sub>O after soaking in various organic solvents for 24 hours.

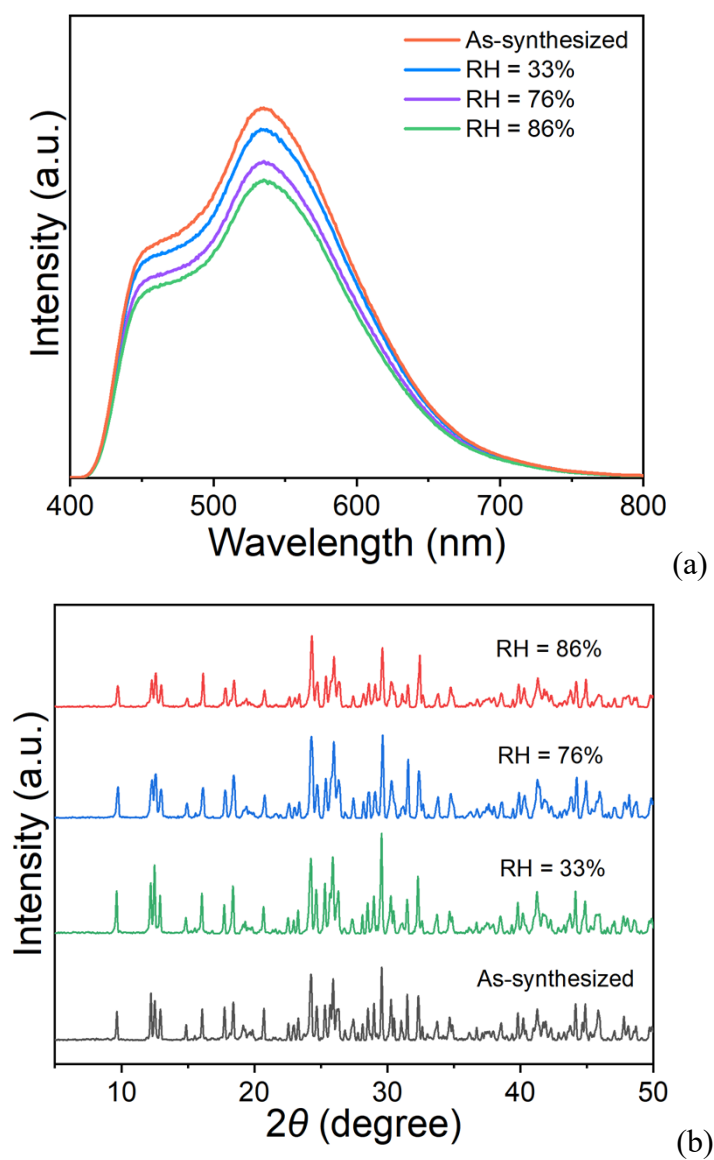

**Figure S10.** (a) The PL spectra and (b) X-ray diffraction (PXRD) patterns under different relative humidity of  $(\text{BAPPz})\text{Cd}_2\text{Br}_8 \cdot 2\text{H}_2\text{O}$ .

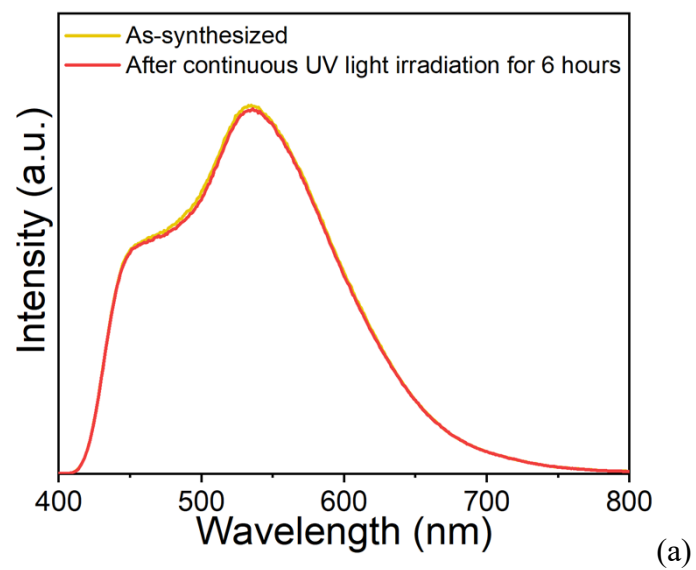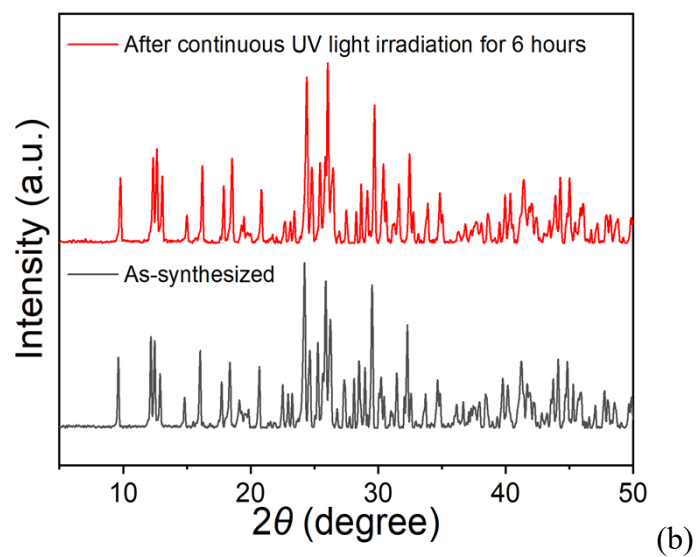

**Figure S11.** (a) The PL spectra and (b) X-ray diffraction (PXRD) patterns under continuous UV light irradiation for over 6 hours of  $(\text{BAPPz})\text{Cd}_2\text{Br}_8 \cdot 2\text{H}_2\text{O}$ .

**Table S1.** Crystal Data and Structural Refinements for (BAPPz)Cd<sub>2</sub>Br<sub>8</sub>·2H<sub>2</sub>O.

| Compound                                                                                 | (BAPPz)Cd <sub>2</sub> Br <sub>8</sub> ·2H <sub>2</sub> O                                     |
|------------------------------------------------------------------------------------------|-----------------------------------------------------------------------------------------------|
| Chemical formula                                                                         | C <sub>10</sub> H <sub>32</sub> N <sub>4</sub> O <sub>2</sub> Cd <sub>2</sub> Br <sub>8</sub> |
| FW                                                                                       | 552.24                                                                                        |
| Space group                                                                              | <i>P</i> -1                                                                                   |
| <i>a</i> /Å                                                                              | 7.0976(4)                                                                                     |
| <i>b</i> /Å                                                                              | 9.1098(5)                                                                                     |
| <i>c</i> /Å                                                                              | 11.0003(6)                                                                                    |
| $\alpha$ /°                                                                              | 86.013(2)                                                                                     |
| $\beta$ /°                                                                               | 84.060(2)                                                                                     |
| $\gamma$ /°                                                                              | 82.390(2)                                                                                     |
| <i>V</i> (Å <sup>3</sup> )                                                               | 700.08(7)                                                                                     |
| <i>Z</i>                                                                                 | 2                                                                                             |
| <i>D</i> <sub>calcd</sub> (g·cm <sup>-3</sup> )                                          | 2.620                                                                                         |
| Temp (K)                                                                                 | 273.15                                                                                        |
| $\mu$ (mm <sup>-1</sup> )                                                                | 12.947                                                                                        |
| <i>F</i> (000)                                                                           | 512.0                                                                                         |
| Reflections collected                                                                    | 13809                                                                                         |
| Unique reflections                                                                       | 3467                                                                                          |
| GOF on <i>F</i> <sup>2</sup>                                                             | 1.078                                                                                         |
| <sup>a</sup> <i>R</i> <sub>1</sub> , <i>wR</i> <sub>2</sub> ( <i>I</i> > 2σ( <i>I</i> )) | 0.0299/0.0730                                                                                 |
| <sup>b</sup> <i>R</i> <sub>1</sub> , <i>wR</i> <sub>2</sub> (all data)                   | 0.0347/0.0751                                                                                 |

$${}^a R_1 = \sum ||F_o| - |F_c|| / \sum |F_o|. \quad {}^b wR_2 = [\sum w(F_o^2 - F_c^2)^2 / \sum w(F_o^2)^2]^{1/2}.$$

**Table S2.** Selected bond lengths (Å) and bond angles (°) for (BAPPz)Cd<sub>2</sub>Br<sub>8</sub>·2H<sub>2</sub>O.

| Bond              | Length (Å) | Bond              | Length (Å)  |
|-------------------|------------|-------------------|-------------|
| Cd(1)-Br(1)       | 2.5770(5)  | Cd(1)-Br(2)       | 2.6010(16)  |
| Cd(1)-Br(3)       | 2.5769(5)  | Cd(1)-Br(4)       | 2.6430(4)   |
| Bond angle        | Degree (°) | Bond angle        | Degree (°)  |
| Br(1)-Cd(1)-Br(3) | 106.43(13) | Br(3)-Cd(1)-Br(2) | 111.6(6)    |
| Br(1)-Cd(1)-Br(4) | 106.02(13) | Br(3)-Cd(1)-Br(4) | 109.865(14) |
| Br(2)-Cd(1)-Br(4) | 101.30(6)  |                   |             |

**Table S3.** Summary of the properties of white LED materials.

| Materials                                                                                                    | Emission (nm) | Types of phosphors | PLQY   | CRI  | CCT    | Reference                                                         |
|--------------------------------------------------------------------------------------------------------------|---------------|--------------------|--------|------|--------|-------------------------------------------------------------------|
| (H <sub>2</sub> DABCO)Pb <sub>2</sub> Cl <sub>6</sub>                                                        | 455, 585      | 0                  | 2.5%   | 96   | 5393 K | <i>Chem. Sci.</i> , <b>2015</b> , 6, 7222-7226.                   |
| [(2-mb)tpp] <sub>2</sub> MnCl <sub>4</sub>                                                                   | 513           | 2                  | 64.07% | 95.4 | 5305 K | <i>Chem. Eng. J.</i> , <b>2022</b> , 450, 138458.                 |
| (DMP)CdBr <sub>3</sub>                                                                                       | 432           | 2                  | 52.3%  | 95.4 | 4922 K | <i>Mater. Today Chem.</i> , <b>2022</b> , 24, 100766.             |
| (BAPPz)Cd <sub>2</sub> Br <sub>8</sub> • 2H <sub>2</sub> O                                                   | 527           | 1                  | 13.78% | 93.7 | 6556 K | <b>This work</b>                                                  |
| Rb <sub>2</sub> Cu <sub>2</sub> I <sub>4</sub> (C <sub>4</sub> H <sub>8</sub> OS) <sub>3</sub>               | 588           | 1                  | 86%    | 93   | 5465 K | <i>Chem. Mater.</i> <b>2023</b> , 35, 1318-1324.                  |
| Cs <sub>3</sub> NaInCl <sub>6</sub> •H <sub>2</sub> O: Sb <sup>3+</sup> ,Bi <sup>3+</sup>                    | 450           | 0                  | 99.5%  | 92.9 | 4936 K | <i>Laser Photonics Rev.</i> <b>2024</b> , 2401084.                |
| (C <sub>3</sub> H <sub>7</sub> ) <sub>4</sub> N] <sub>2</sub> Cu <sub>2</sub> I <sub>4</sub>                 | 483           | 0                  | 91.9%  | 92.2 | 5684 K | <i>ACS Appl. Mater. Interfaces</i> <b>2022</b> , 14, 12395-12403. |
| ZJU28⊃DSM/AF                                                                                                 | 625           | 0                  | 60.72% | 91   | 5327   | <i>Adv. Funct. Mater.</i> <b>2015</b> , 25, 4796-4802.            |
| Zn(SCN) <sub>2</sub> -codoped CsPbBr <sub>3</sub> NCs                                                        | 514           | 1                  | 90%    | 89   | 6046 K | <i>J. Alloy. Compd.</i> <b>2024</b> , 1005, 176064.               |
| (H <sub>3</sub> O)(Et <sub>2</sub> -DABCO) <sub>8</sub> Pb <sub>21</sub> Cl <sub>59</sub>                    | 420, 690      | 0                  | 1%     | 88   | 3496 K | <i>Chem. Sci.</i> , <b>2015</b> , 6, 7222-7226.                   |
| (C <sub>25</sub> H <sub>22</sub> P) <sub>2</sub> SbCl <sub>5</sub>                                           | 593           | 1                  | 98.6%  | 87   | 4000 K | <i>ACS Appl. Mater. Interfaces</i> <b>2022</b> , 14, 45611-45620. |
| (C <sub>19</sub> H <sub>18</sub> P) <sub>2</sub> Cu <sub>4</sub> I <sub>6</sub>                              | 620           | 0                  | 87.4%  | 86.7 | 5233 K | <i>Adv. Optical Mater.</i> <b>2024</b> , 12, 2401050.             |
| CsBr/Eu <sup>2+</sup> nanocrystal                                                                            | 447           | 2                  | 55.8%  | 85.6 | 3920 K | <i>ACS Appl. Nano Mater.</i> <b>2024</b> , 7, 20145-20152.        |
| Cs <sub>2</sub> Ag <sub>0.80</sub> K <sub>0.20</sub> In <sub>0.875</sub> Bi <sub>0.125</sub> Cl <sub>6</sub> | 629           | 1                  | 15.96% | 85   | 3878 K | <i>J. Alloy. Compd.</i> <b>2023</b> , 960, 170836.                |
| InCl <sub>3</sub> -TPOBD                                                                                     | 547           | 0                  | 10.5%  | 84.8 | 9370 K | <i>Adv. Funct. Mater.</i> <b>2023</b> , 33, 2214962.              |
| PPASnCl <sub>6</sub> :3.5%Sb                                                                                 | 660           | 2                  | 77%    | 84   | 5863 K | <i>Adv. Optical Mater.</i> <b>2021</b> , 9, 2101637.              |

|                                                                                                                      |          |   |       |      |         |                                                                                        |
|----------------------------------------------------------------------------------------------------------------------|----------|---|-------|------|---------|----------------------------------------------------------------------------------------|
| Mn@C <sub>4</sub> H <sub>12</sub> N <sub>2</sub> ZnBr <sub>4</sub>                                                   | 518      | 2 | 99.1% | 83.3 | 5811 K  | <i>Chem. Eng. J.</i> , <b>2023</b> ,<br>468, 143818.                                   |
| (HMEDA)CdBr <sub>4</sub>                                                                                             | 445      | 0 | ~1%   | 83   | 10536 K | <i>Chem Asian J.</i> <b>2020</b> , <i>15</i> ,<br>3050-3058.                           |
| [Cu <sub>4</sub> I <sub>4</sub> (Ph <sub>3</sub> As) <sub>3</sub> ]                                                  | 565      | 0 | 100%  | 82   | 6000 K  | <i>Adv. Optical Mater.</i><br><b>2024</b> , <i>12</i> , 2302904.                       |
| (C <sub>9</sub> NH <sub>20</sub> ) <sub>9</sub> [Pb <sub>3</sub> Br <sub>11</sub> ](MnBr <sub>4</sub> ) <sub>2</sub> | 565, 528 | 1 | 49.8% | 79   | 6022 K  | <i>Angew. Chem., Int. Ed.</i><br><b>2019</b> , <i>58</i> , 18670-18675.                |
| K(La <sub>0.98</sub> Bi <sub>0.02</sub> )Ta <sub>2</sub> O <sub>7</sub>                                              | 550      | 1 | 42.3% | 77.8 | 6710    | <i>ACS Appl. Mater.</i><br><i>Interfaces</i> <b>2018</b> , <i>10</i> ,<br>24648-24655. |
| [Pb <sub>2</sub> Cl <sub>2</sub> <sup>2+</sup> ][3,5-pdc <sup>2-</sup> ]                                             | 411      | 1 | 72%   | 70   | 5534 K  | <i>Adv. Optical Mater.</i><br><b>2022</b> , <i>10</i> , 2102148.                       |
